# Supplementary material for: A New Bioactive Compound From the Marine Sponge-Derived Streptomyces sp. SBT348 Inhibits Staphylococcal Growth and Biofilm Formation
Source: Front Microbiol. 2018 Jul 11;9:1473. doi: 10.3389/fmicb.2018.01473 (PMC6050364; doi:10.3389/fmicb.2018.01473)
Supplement: Supplementary file 1 [file Table_1.xlsx]

## Sheet: Table S1
List of upregulated genes after 20 min
Annotation	Log2fold change	padj value	Description
SERP0100	2.99447	8.21238e-23	LysM domain protein
SERP0278	2.76344	0.0207439	hypothetical protein
SERP0318	2.60731	5.7786e-12	LysM domain protein
SERP0354	3.79692	3.10603e-11	conserved hypothetical protein
SERP0618	2.12306	0.000739356	ComK family protein
SERP0724	2.47675	2.89472e-07	conserved hypothetical protein
SERP0886	6.4343	9.67103e-113	ABC transporter ATP-binding protein
SERP0887	3.64965	8.60309e-37	ABC transporter permease protein
SERP0888	2.79557	8.42249e-32	sensor histidine kinase putative
SERP0889	2.58985	2.83607e-50	DNA-binding response regulator LuxR family
rplT	2.18935	3.82768e-14	ribosomal protein L20
rpsD	2.21309	0.000221223	ribosomal protein S4
SERP1434	2.42479	2.32168e-18	conserved hypothetical protein;
SERP1610	2.00524	0.000212434	conserved domain protein
czrA	3.41219	3.22863e-10	transcriptional regulator CzrA
SERP1756	3.15724	7.30598e-09	cation efflux family protein
SERP1846	2.39062	0.00239815	transcriptional regulator MarR family
SERP1884	3.1684	3.33306e-16	secretory antigen precursor SsaA putative
sugE-1	3.25948	1.09248e-07	sugE protein
sugE-2	3.74688	1.78185e-07	sugE protein
SERP1888	2.90375	2.01075e-05	D-isomer specific 2-hydroxyacid dehydrogenase family protein
SERP1920	2.59753	2.87101e-08	abortive infection family protein
SERP2038	2.5603	0.00239967	ABC transporter ATP-binding protein
SERP2120	3.4303	1.06566e-52	secretory antigen precursor SsaA-related protein
SERP2433	4.57598	6.87092e-30	conserved hypothetical protein
SERP2434	2.34039	4.1497e-24	rhodanese-like domain protein
SERP2435	3.98863	8.42893e-38	metallo-beta-lactamase family protein
SERP2513	4.63334	7.64121e-94	conserved hypothetical protein
SERP2514	5.3326	3.01181e-26	conserved hypothetical protein
List of downregulated genes after 20 min
Annotation	Log2fold change	padj value	Description
SERP0911	-2.07567	2.05779e-16	conserved hypothetical protein
SERP2361	-2.06373	7.14414e-07	conserved hypothetical protein
